# Supplementary material for: Cystatin C– and Creatinine-Based Estimated Glomerular Filtration Rate, Vascular Disease, and Mortality in Persons With Diabetes in the U.S
Source: PubMed Central journal article supplement — Diabetes Care. 2014 Mar 8;37(4):1002–8. doi: 10.2337/dc13-1910 (PMC3964484; doi:10.2337/dc13-1910), 2014-03-08

SUPPLEMENTARY DATA

**Supplementary Table 1.** Comparison of the classification of reduced kidney function among the population with diabetes (A) and without diabetes (B) according to filtration marker, U.S. adults 20 years or older, NHANES 1999-2002.

(A) Diabetes (N=778)

|                                                      |       | eGFR <sub>cr</sub> (ml/min/1.73 m <sup>2</sup> ) |        |       |
|------------------------------------------------------|-------|--------------------------------------------------|--------|-------|
|                                                      |       | ≥ 60                                             | < 60   | Total |
| eGFR <sub>cys</sub><br>(ml/min/1.73 m <sup>2</sup> ) | ≥ 60  | 74.9 %                                           | 3.1 %  | 78.0% |
|                                                      | <60   | 8.7 %                                            | 13.3 % | 22.0% |
|                                                      | Total | 83.6%                                            | 16.4%  | 100%  |

(B) No Diabetes (N=3,679)

|                                                      |       | eGFR <sub>cr</sub> (ml/min/1.73 m <sup>2</sup> ) |       |       |
|------------------------------------------------------|-------|--------------------------------------------------|-------|-------|
|                                                      |       | ≥ 60                                             | < 60  | Total |
| eGFR <sub>cys</sub><br>(ml/min/1.73 m <sup>2</sup> ) | ≥ 60  | 90.8 %                                           | 1.3 % | 92.1% |
|                                                      | <60   | 3.4 %                                            | 4.5 % | 7.9%  |
|                                                      | Total | 94.2%                                            | 5.8%  | 100%  |

**Supplementary Table 2.** The association between diabetes status and reclassification from preserved kidney function by eGFR<sub>cr</sub> to reduced kidney function by eGFR<sub>cys</sub> with sequential adjustment for eGFR<sub>cr</sub>, body mass index (BMI), age, and albuminuria\*.

| Model                                         | Odds ratio for diabetes (95% CI) | P-value |
|-----------------------------------------------|----------------------------------|---------|
| Unadjusted                                    | 3.1 (1.9-4.9)                    | <0.001  |
| + eGFR <sub>cr</sub>                          | 2.3 (1.5-3.8)                    | 0.001   |
| + eGFR <sub>cr</sub> , BMI                    | 2.0 (1.2-3.4)                    | 0.008   |
| + eGFR <sub>cr</sub> , BMI, age               | 1.4 (0.9-2.3)                    | 0.2     |
| + eGFR <sub>cr</sub> , BMI, age, albuminuria* | 1.2 (0.7-2.1)                    | 0.5     |

\*modeled as albumin-to-creatinine ratio >30 mg/g (yes, no)

SUPPLEMENTARY DATA

**Supplementary Figure 1.** Prevalence of reduced kidney function (eGFR<60 ml/min/1.73 m<sup>2</sup>) by filtration marker and subgroups defined by sex, race, age and body mass index category, U.S. adults 20 years or older with diabetes, NHANES 1999-2002 (N=778).

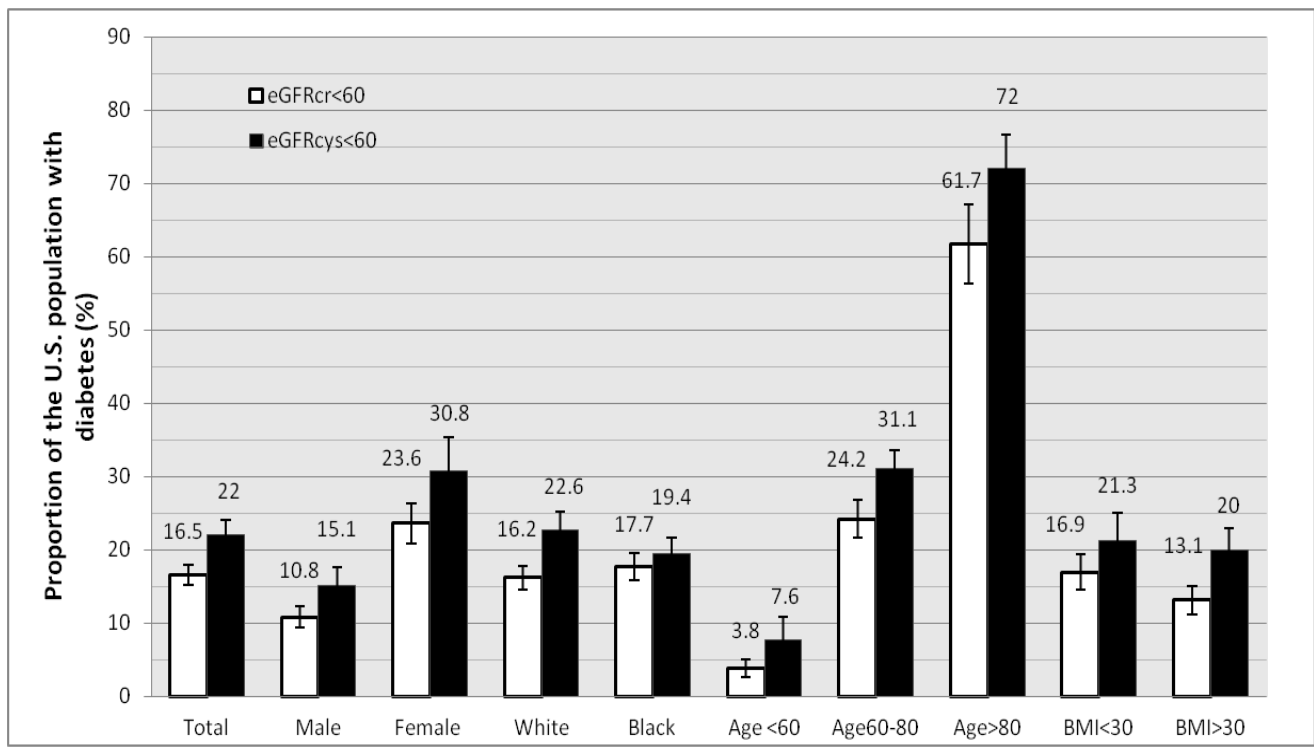

SUPPLEMENTARY DATA

**Supplementary Figure 2.** Probability of prevalent coronary artery disease (A), peripheral arterial disease (B), albuminuria (C), or retinopathy (D) by level of GFR estimating using serum creatinine (black line, with 95% CI) and serum cystatin C (red line, with 95% CI) among adult participants with diabetes (N=778).

(A) Coronary artery disease

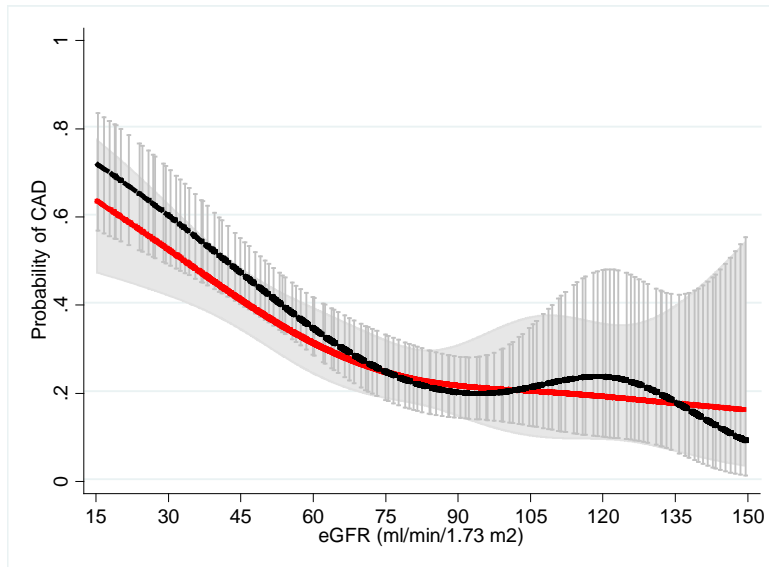

(B) Peripheral arterial disease (ankle brachial index < 0.90)

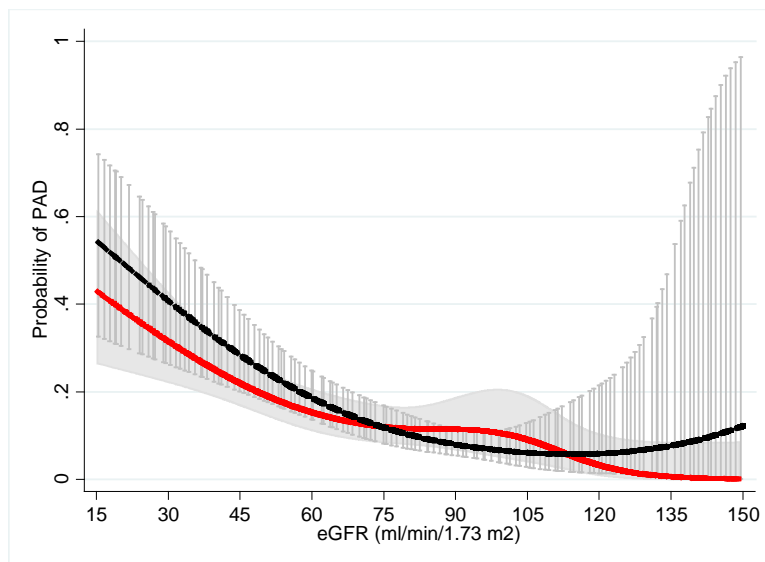

SUPPLEMENTARY DATA

(C) Albuminuria (albumin-to-creatinine ratio >30 mg/g)

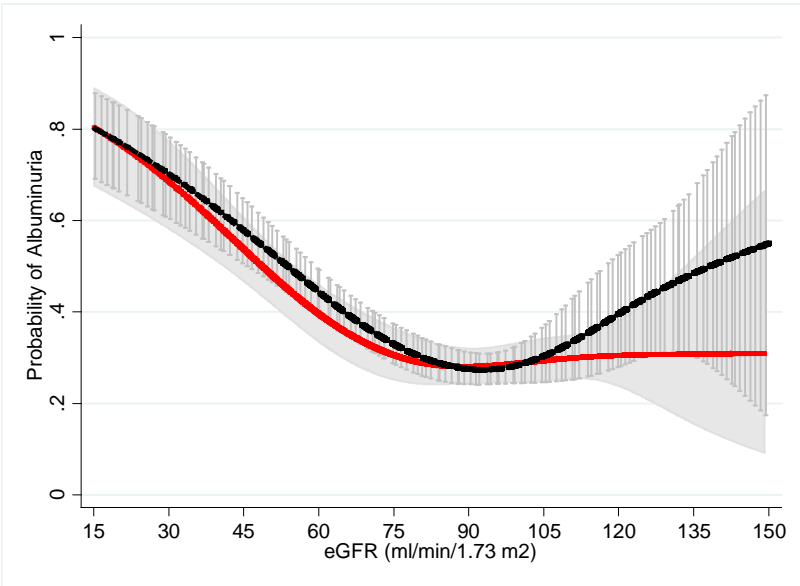

(D) Retinopathy

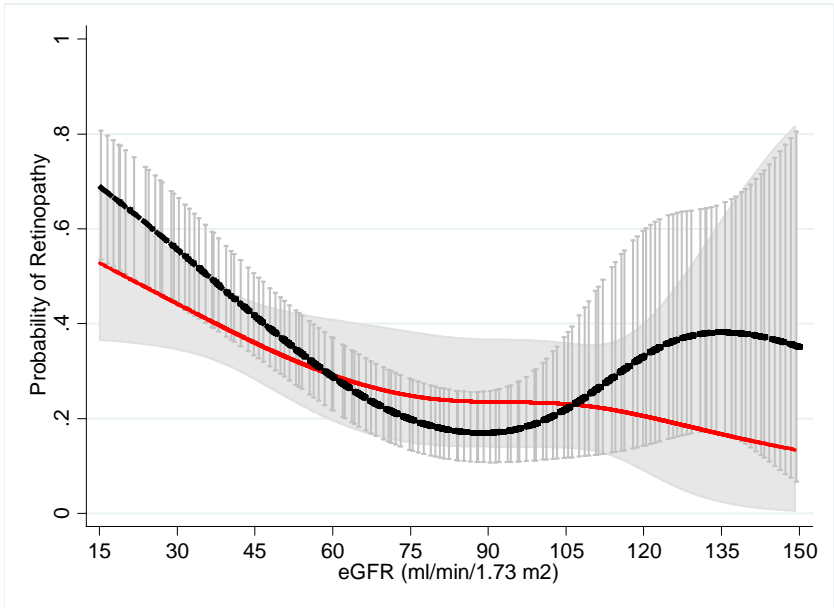

Supplement: supp_dc13-1910v131910_DC131910SupplementaryData.pdf [file supp_dc13-1910v131910_DC131910SupplementaryData.pdf]
